# Supplementary material
Source: PubMed Central journal article supplement (PMC208758)
Supplement: pnas_100_20_11339__5.pdf [file pnas_100_20_11339__5.pdf]

Fig. 5. A log-log plot of the fractions of the various species of  $\text{TF}_1\text{-ATPase}$  that contribute to the total concentration of the  $\text{TF}_1\text{-ATPase}$  as a function of the ATP concentration in the absence of ADP, Pi in the solution. a, S; b,  $S(\beta_{\text{DP}}, \text{D})$ ; c,  $S(\beta_{\text{DP}}, \text{T})$ ; d,  $S(\beta_{\text{E}}, \text{T}; \beta_{\text{DP}}, \text{D}) + S(\beta_{\text{E}}, \text{D}; \beta_{\text{DP}}, \text{D})$ ; e,  $S(\beta_{\text{E}}, \text{T}; \beta_{\text{DP}}, \text{T})$ .
