# Supplementary material
Source: PubMed Central journal article supplement (PMC208758)

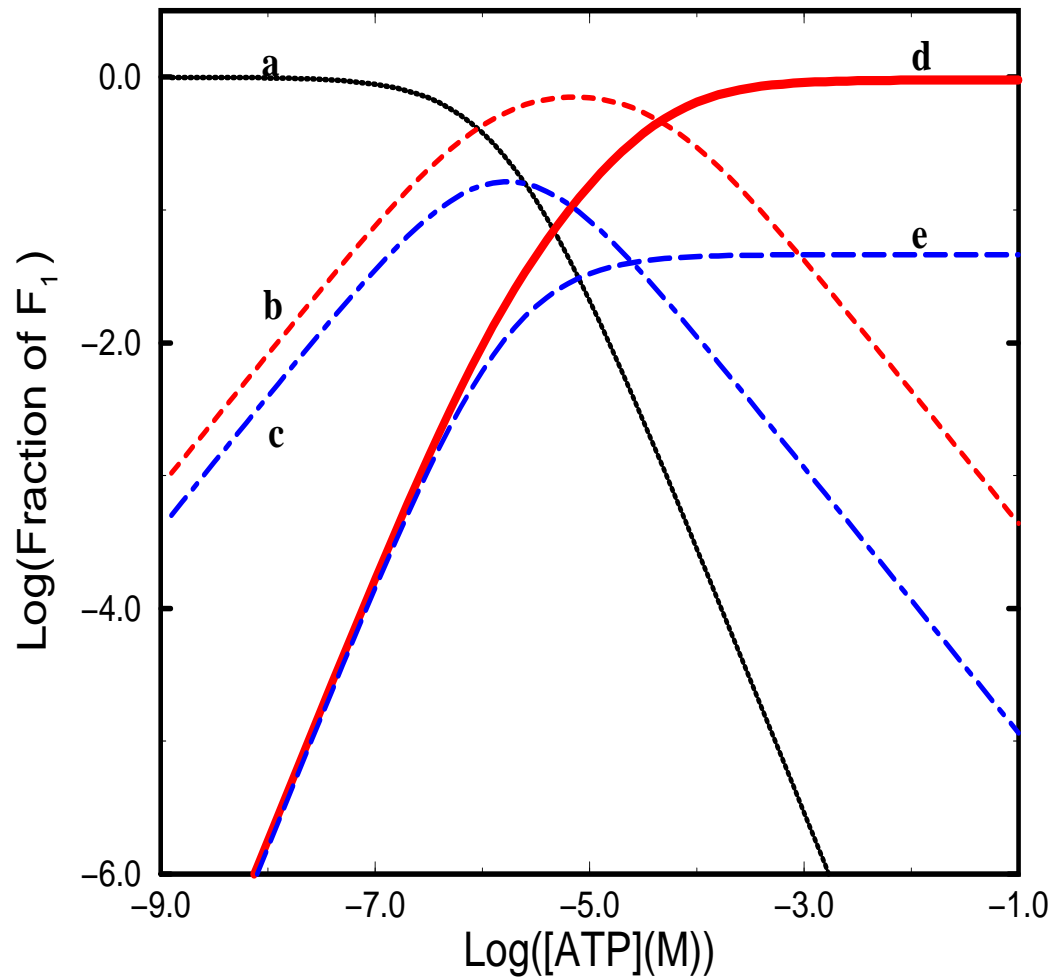

Supplement: pnas_100_20_11339__4.pdf [file pnas_100_20_11339__4.pdf]

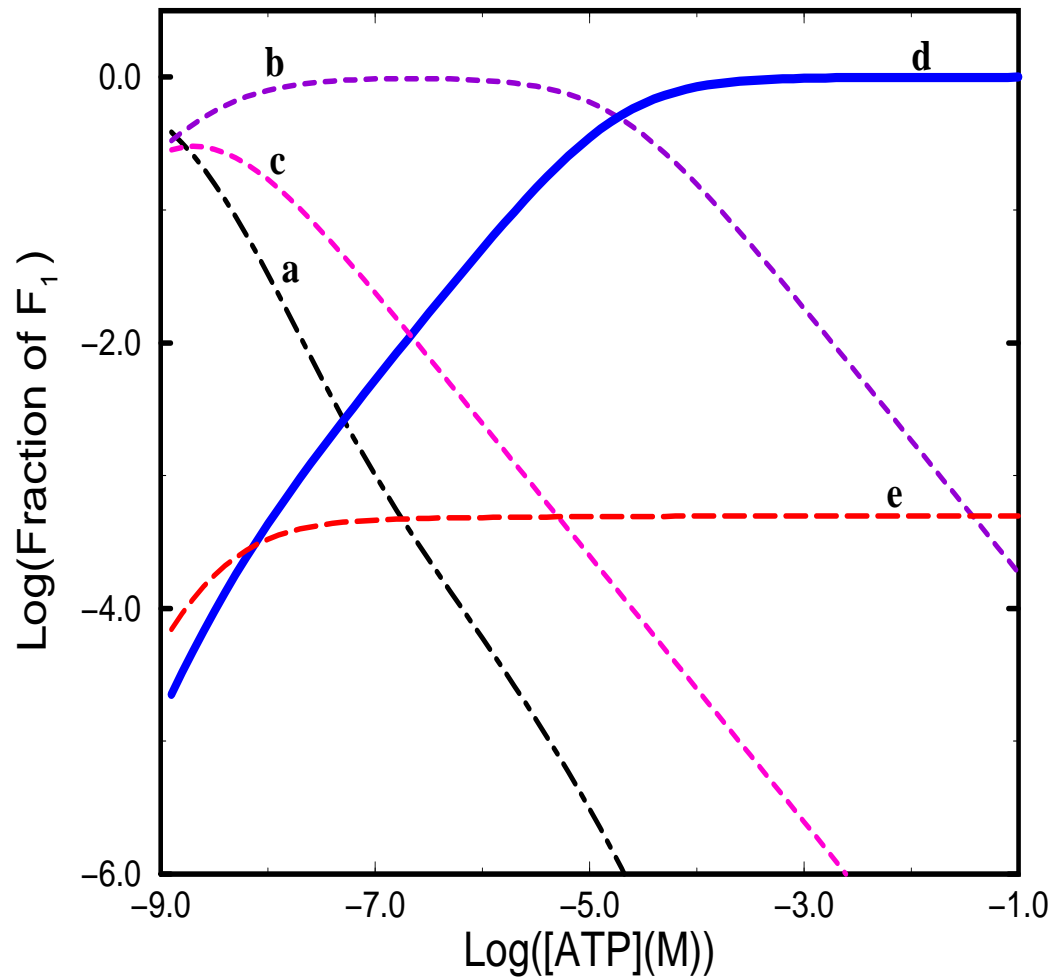

Supplement: pnas_100_20_11339__6.pdf [file pnas_100_20_11339__6.pdf]
